# Supplementary material for: Long-term physical inactivity induces significant changes in biochemical pathways related to metabolism of proteins and glycerophospholipids in mice
Source: Royal Society of Chemistry journal article supplement (doi:10.1039/d3mo00127j), 2023-10-16

Fig. S3

Compounds correlated with Asparagine

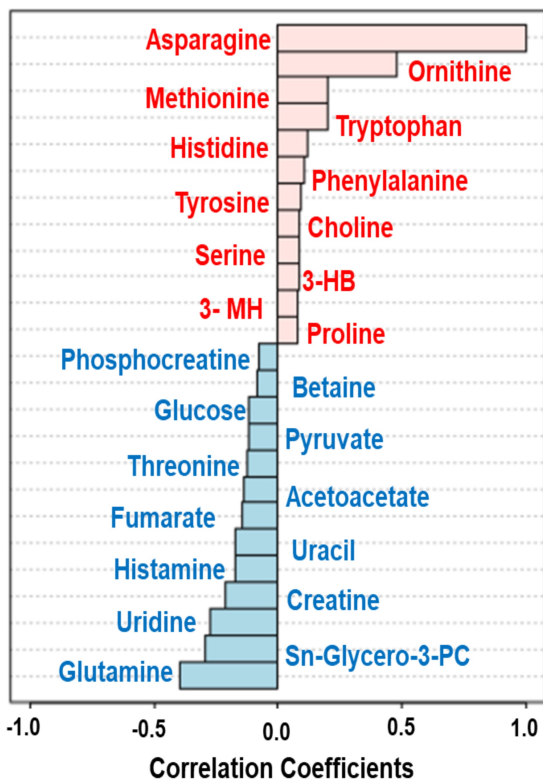

Compounds correlated with Malonate

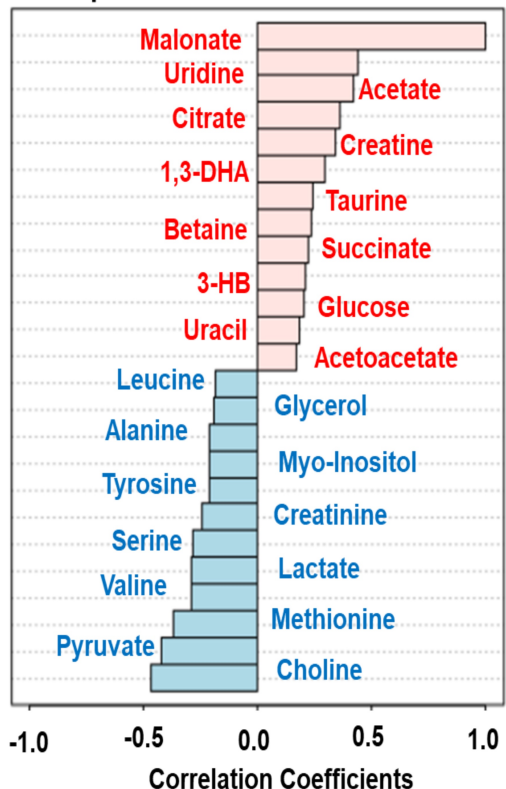

Compounds correlated with Uridine

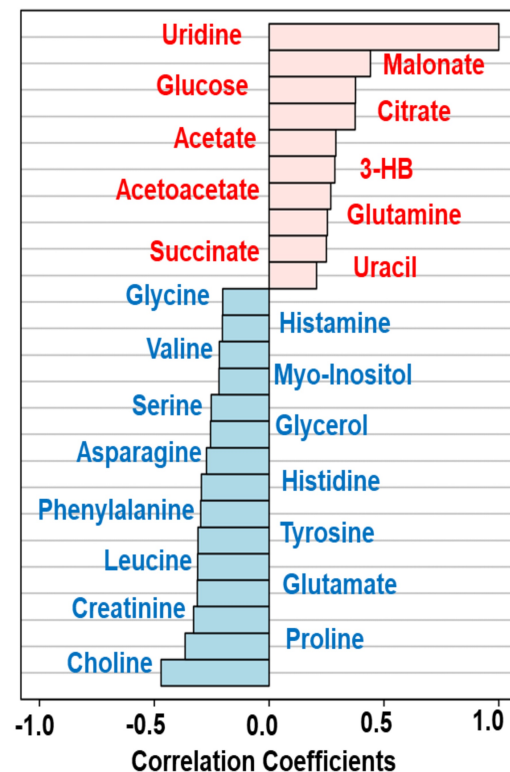

Supplement: d3mo00127j5.pdf [file d3mo00127j5.pdf]
