# Supplementary figures and images for: Long-term physical inactivity induces significant changes in biochemical pathways related to metabolism of proteins and glycerophospholipids in mice
Source: Royal Society of Chemistry journal article supplement (doi:10.1039/d3mo00127j), 2023-10-16

Fig. S1

A

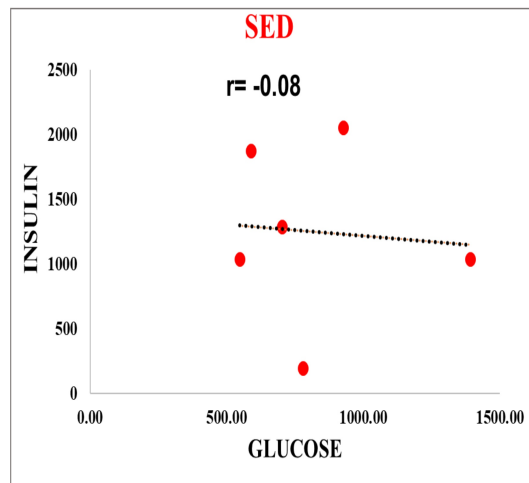

B

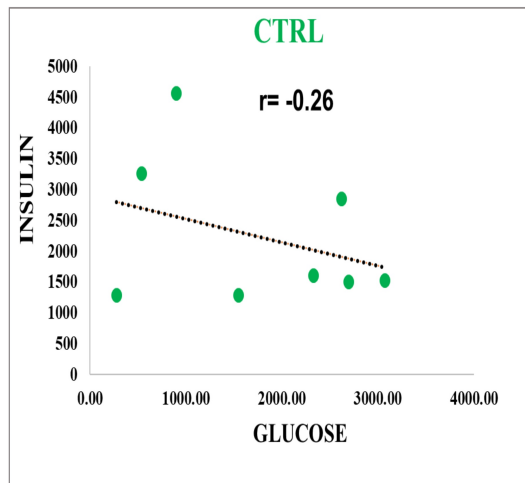

C

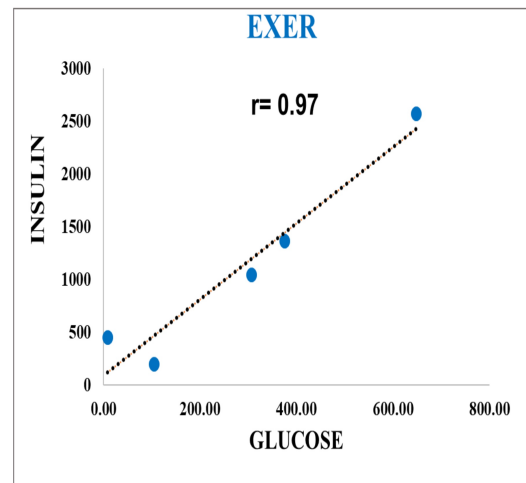

Supplement: d3mo00127j3.pdf [file d3mo00127j3.pdf]

Fig. S2

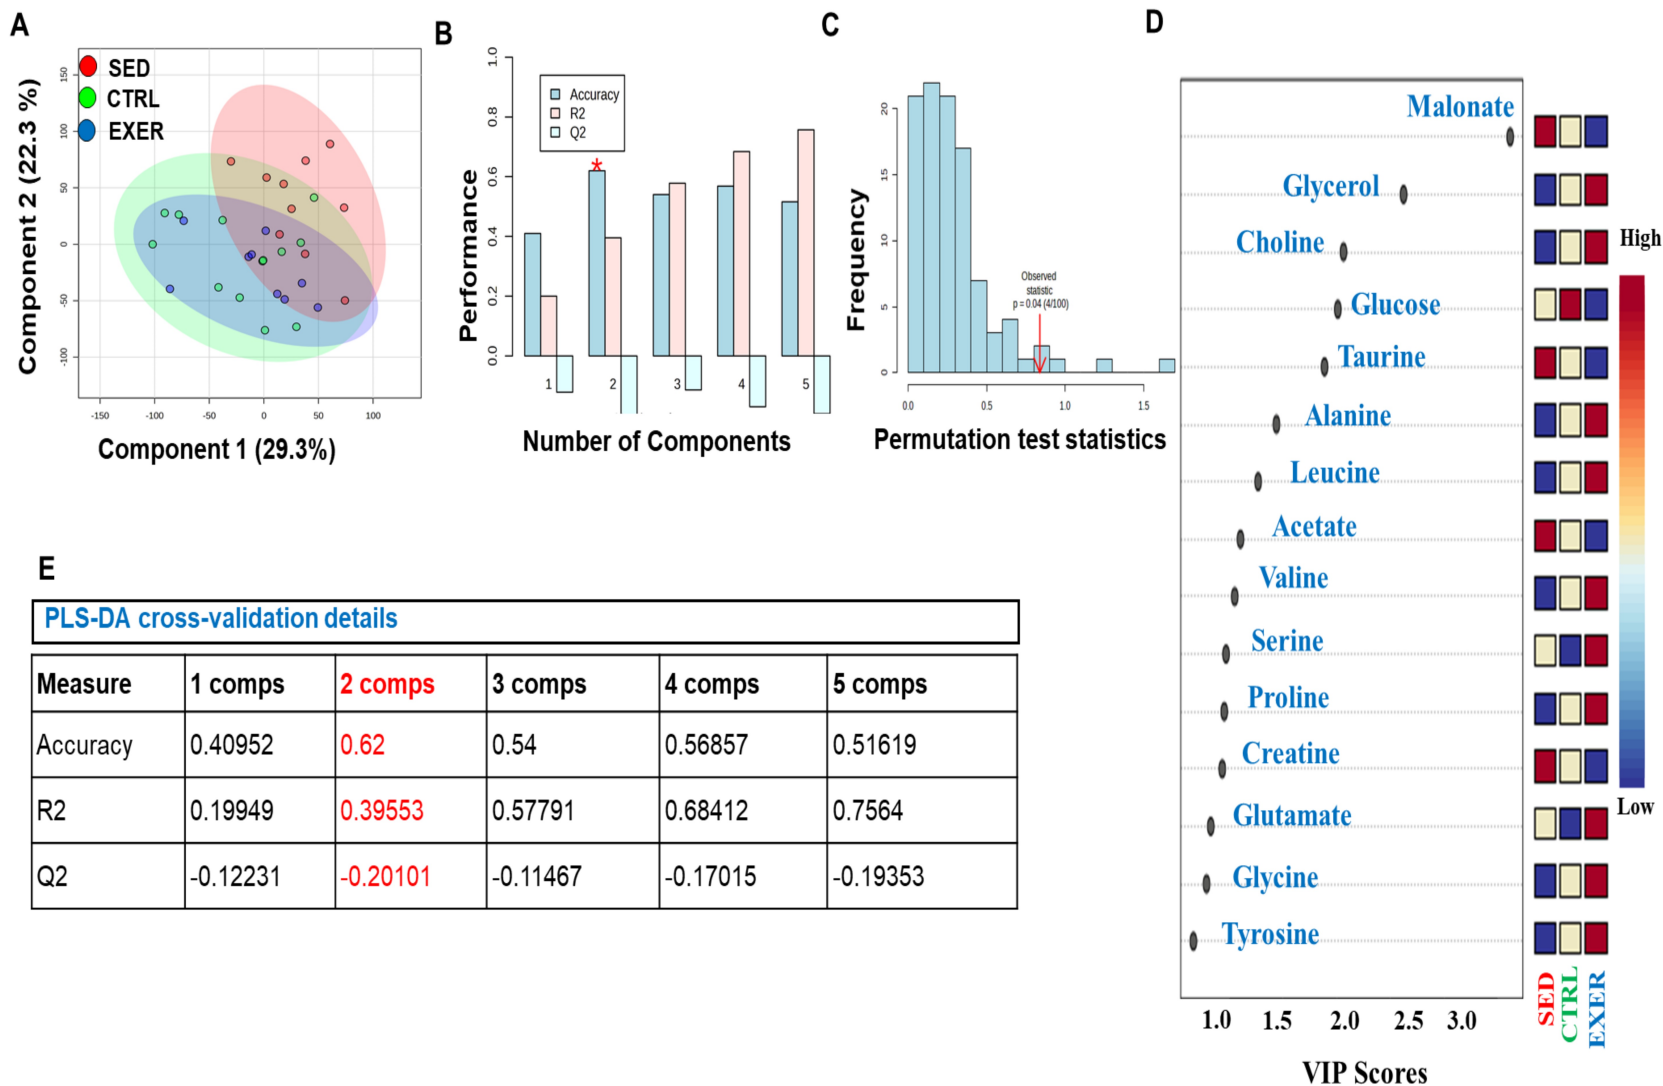

Supplement: d3mo00127j4.pdf [file d3mo00127j4.pdf]
